# Supplementary material for: Nicotine Pouch Use Among US Military Personnel
Source: PubMed Central journal article supplement (PMC11653119; doi:10.1001/jamanetworkopen.2024.51517), 2024-12-17
Supplement: jamanetwopen-e2451517-s001.pdf [file jamanetwopen-e2451517-s001.pdf]

## Data Sharing Statement

Little. Nicotine Pouch Use Among US Military Personnel. *JAMA Netw Open*. Published December 17, 2024. doi:10.1001/jamanetworkopen.2024.51517

### Data

**Data available:** No

### Additional Information

**Explanation for why data not available:** This data is owned by the Department of Defense and is not able to be shared.
